# Supplementary material for: Fault-controlled dolomitization in the Montagna dei Fiori Anticline (Central Apennines, Italy): Record of a dominantly pre-orogenic fluid migration
Source: Copernicus journal article supplement (doi:10.5194/se-2018-136), 2019-01-03
Supplement: Supplementary file [file se-2018-136-AC1-supplement.zip]

|                       | Stable isotopes       |                       | Sr isotopes                     | Fluid inclusion microthermometry |              |           |
|-----------------------|-----------------------|-----------------------|---------------------------------|----------------------------------|--------------|-----------|
|                       | $\delta^{13}\text{C}$ | $\delta^{18}\text{O}$ | $^{87}\text{Sr}/^{86}\text{Sr}$ | Th ( $^{\circ}\text{C}$ )        | Salinity     | n         |
| Calcare Massiccio Fm. | +2.4 to +3.1          | -1.6 to 0.0           | 0.70766                         | -                                | -            |           |
| Corniola Fm.          | +2.0 to +2.5          | -3.1 to -1.4          | 0.70725                         | -                                | -            |           |
| Scaglia Fm.           | +1.0 to +3.1          | -2.2 to -1.0          | 0.70784-0.70791                 | -                                | -            |           |
| D1                    | +2.5                  | -1.9                  | 0.70789                         | $\leq 40\text{-}50$              | 3.5 to 11.3  | <u>27</u> |
| CV1                   | +1.6 to +2.1          | -4.7 to -2.7          | 0.70773                         | -                                | -            | <u>2</u>  |
| D2                    | -                     | -                     | -                               | $\leq 40\text{-}50$ to 71        | 7.9 to 20.5  | <u>37</u> |
| D3                    | +2.0 to +2.6          | -2.8 to -1.9          | 0.70859-0.70964                 | 70 to 73                         | 9.2 to 16.9  | <u>9</u>  |
| D4                    | +2.4 to +2.5          | -3.0 to -2.5          | 0.70790                         | 79 to 105                        | 12.8 to 18.6 | <u>7</u>  |
| CV2                   | +1.2 to +3.1          | -1.7 to -1.6          | 0.70779 - 0.70787               | -                                | -            |           |
| CV3                   | +0.5 to +2.4          | -2.2 to 0.0           | -                               | $\leq 40\text{-}50$              | 4.5 to 9.7   | <u>9</u>  |
| CV4                   | +3.8 to +4.9          | -9.4 to -9.1          | -                               | $\leq 40\text{-}50$              | 0.17 to 3.0  | <u>19</u> |

Table. 1
